# Supplementary material for: Based on the synergistic effect of Mg2+ and antibacterial peptides to improve the corrosion resistance, antibacterial ability and osteogenic activity of magnesium-based degradable metals
Source: Royal Society of Chemistry journal article supplement (doi:10.1039/d0bm01584a), 2020-11-19
Supplement: d0bm01584a1.pdf [file d0bm01584a1.pdf]

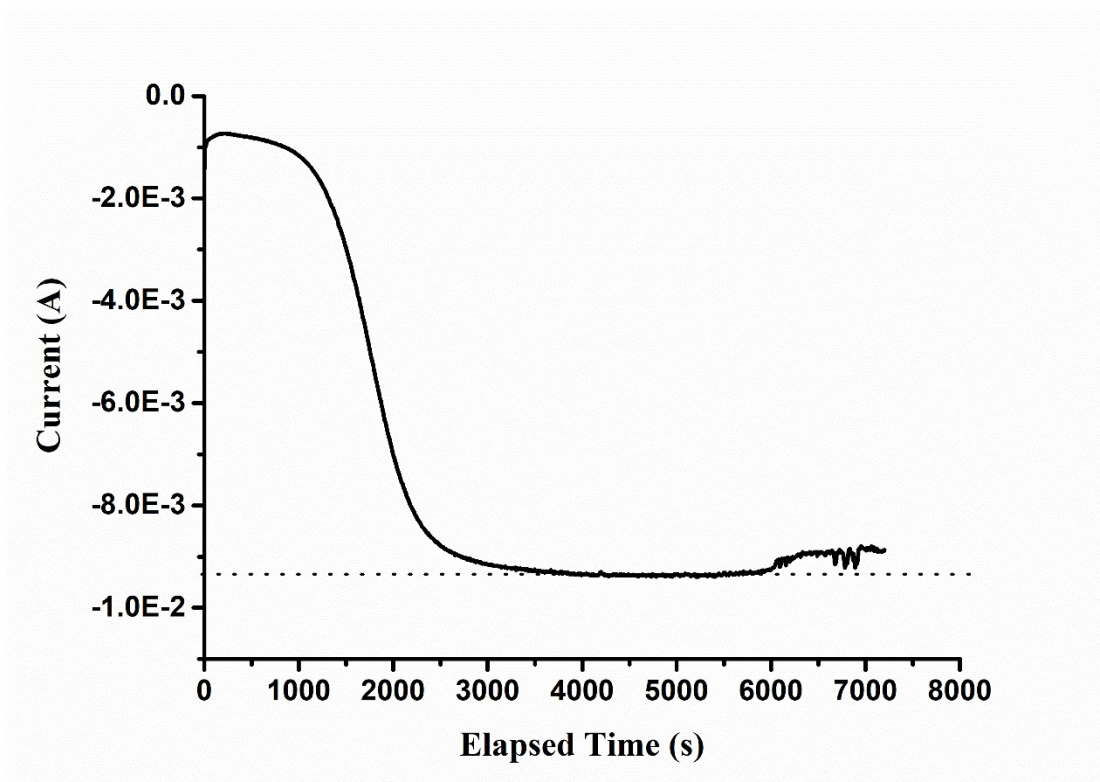

Figure S1 Voltage-time curve of anodization process.

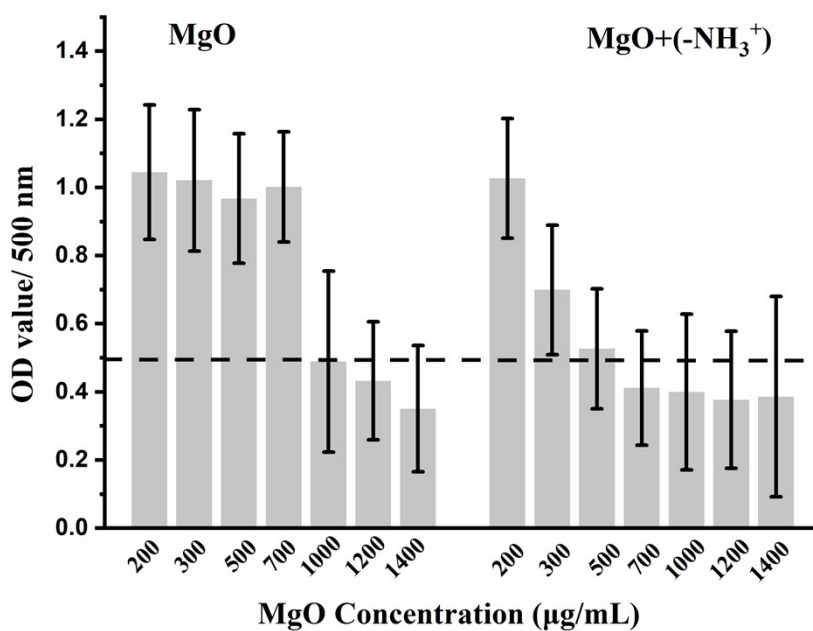

Figure S2 Synergistic antibacterial ability of MgO nanoparticles and AMPs.

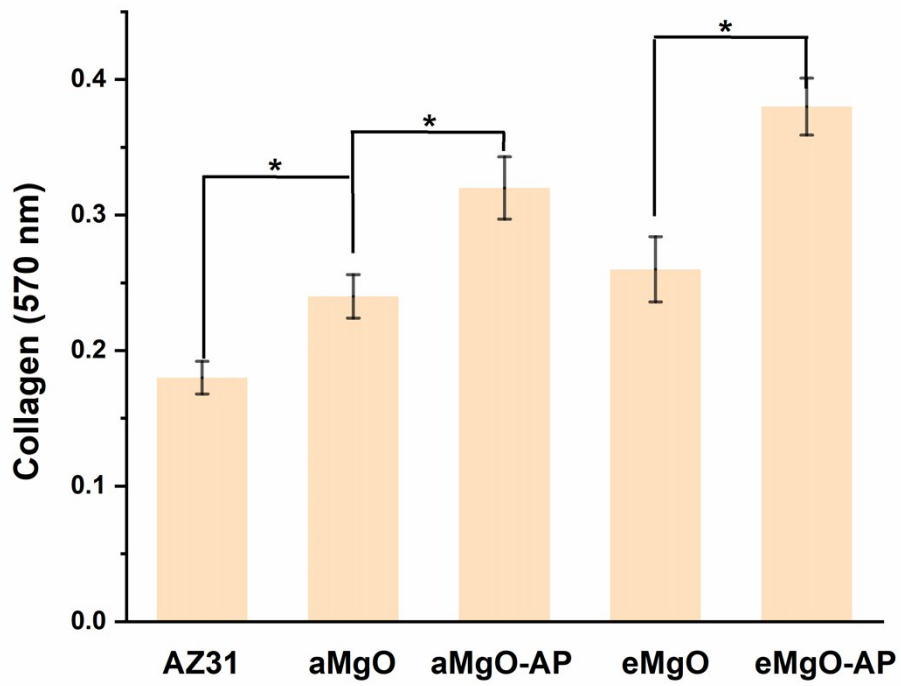

Figure S3 Quantitative of collagen secretion.

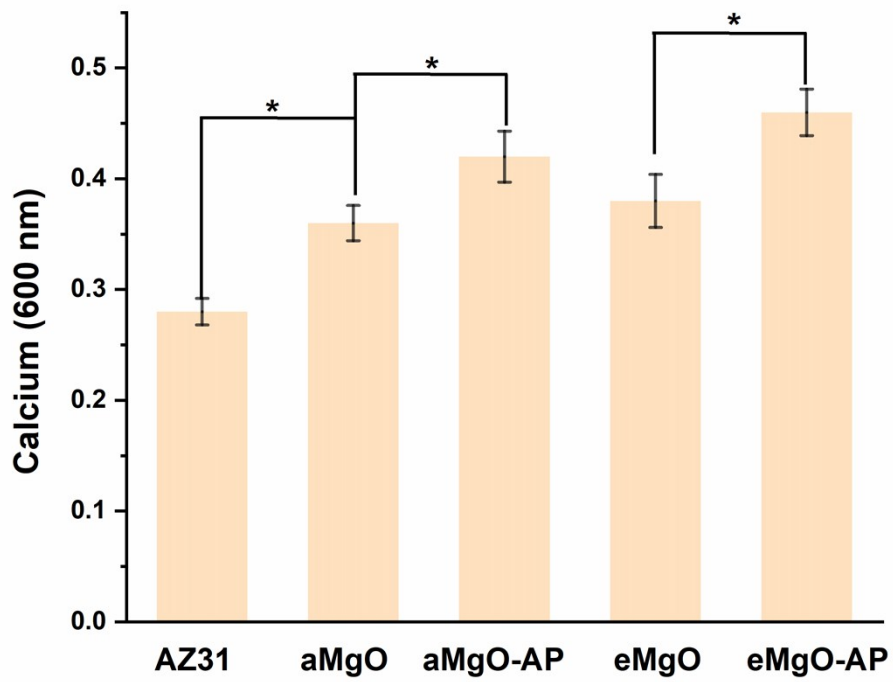

---

Figure S4 Quantitative of calcium deposition.
